26. Pope TM: Legal briefing: New penalties for ignoring advance directives and do-not-resuscitate orders. *J Clin Ethics* 2017; 28:74–81
27. Ruisch JE, Sipers W, Plum PF, Spaetgens B: Individualized approach to reconsider perioperative do-not-resuscitate orders in frail older patients. *Geriatr Gerontol Int* 2020; 20:989–90
28. Aucoin SD, Hao M, Sohi R, Shaw J, Bentov I, Walker D, McIsaac DI: Accuracy and feasibility of clinically applied frailty instruments before surgery: A systematic review and meta-analysis. *ANESTHESIOLOGY* 2020; 133:78–95
29. Cooper L, Abbett SK, Feng A, Bernacki RE, Cooper Z, Urman RD, Frain LN, Edwards AF, Blitz JD, Javedan H, Bader AM: Launching a geriatric surgery center: Recommendations from the Society for Perioperative Assessment and Quality Improvement. *J Am Geriatr Soc* 2020; 68:1941–6
30. Eamer G, Gibson JA, Gillis C, Hsu AT, Krawczyk M, MacDonald E, Whitlock R, Khadaroo RG: Surgical frailty assessment: A missed opportunity. *BMC Anesthesiol* 2017; 17:99
31. O'Neill BR, Batterham AM, Hollingsworth AC, Durrant JW, Danjoux GR: Do first impressions count? Frailty judged by initial clinical impression predicts medium-term mortality in vascular surgical patients. *Anaesthesia* 2016; 71:684–91
32. Olufajo OA, Tulebaev S, Javedan H, Gates J, Wang J, Duarte M, Kelly E, Lilley E, Salim A, Cooper Z: Integrating geriatric consults into routine care of older trauma patients: One-year experience of a level I trauma center. *J Am Coll Surg* 2016; 222:1029–35
33. Lupa D; American Academy of Hospice and Palliative Medicine Workforce Task Force: Estimate of current hospice and palliative medicine physician workforce shortage. *J Pain Symptom Manage* 2010; 40:899–911
34. American Geriatrics Society: State of the geriatrician workforce. Available at: <https://www.americangeriatrics.org/geriatrics-profession/about-geriatrics/geriatrics-workforce-numbers>. Accessed April 12, 2021.

## ANESTHESIOLOGY REFLECTIONS FROM THE WOOD LIBRARY-MUSEUM

### Shipway Apparatus: Warming up to Ether Administration

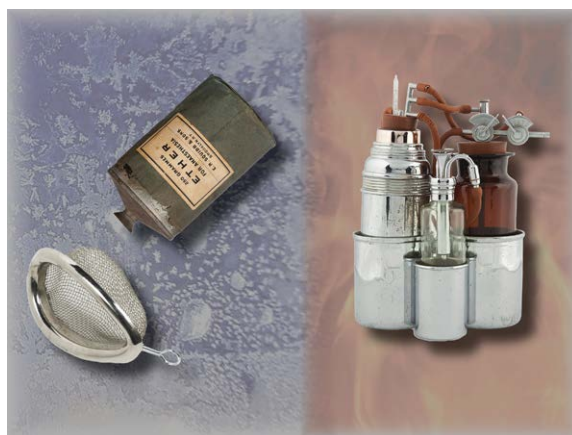

The optimal temperature for vaporized anesthetics was a hot topic in 1916 when Francis E. Shipway, M.D. (1875 to 1968), introduced his eponymous apparatus for warm anesthetic delivery (*right*). The technique gathered steam on both sides of the Atlantic when prominent anesthesiologist James T. Gwathmey, M.D., published on warm ether administration in the United States. Unlike the simple wire-mesh mask (*lower left*) used for “cold ether,” the Shipway apparatus consisted of two vaporizers—one each for ether and chloroform—and a thermos containing a “U-tube” in heated water. Shipway’s previously frosty relationships with surgeons thawed when everyone realized that warm ether meant cooler operating rooms. Heated vapors also appeared to provide smoother anesthetic delivery, fewer pulmonary complications, and improved temperature regulation for the patient. After the fervor for warm anesthetics cooled, Shipway’s career only continued to heat up. He was knighted in 1928 after anesthetizing King George V for several procedures. (Copyright © the American Society of Anesthesiologists’ Wood Library-Museum of Anesthesiology.)

*Melissa L. Coleman, M.D., Penn State College of Medicine, Hershey, Pennsylvania, and Jane S. Moon, M.D., University of California, Los Angeles, California.*
